# Supplementary material for: Unconventional Yeasts Are Tolerant to Common Antifungals, and Aureobasidium pullulans Has Low Baseline Sensitivity to Captan, Cyprodinil, and Difenoconazole
Source: Antibiotics (Basel). 2020 Sep 15;9(9):602. doi: 10.3390/antibiotics9090602 (PMC7557980; doi:10.3390/antibiotics9090602)
Supplement: Supplementary file 1 [file antibiotics-09-00602-s001.xlsx]

## Sheet: Species list
Count of Isolate	Column Labels
Row Labels	8-hydroxyquinoline sulfate	Amphotericin B	Boscalid	Capsofungin	Captan	Chorus	Flint	Fluconazole	None	Slick	Grand Total
Apiotrichum								1			1
Apiotrichum porosum				1			1	1	1		4
Aureobasidium pullulans		7		13	10	6	10	11	3	16	76
Barnettozyma california	1							1			2
Bullera alba		3					1		2		6
Candida californica										2	2
Chytridiales									1		1
Cryptococcus		1			1	2	1	1			6
Cryptococcus					1				1		2
Cryptococcus laurentii	1	5	4	3	2	6	3	4	1	3	32
Cryptococcus/ Naganishia								1			1
Curvibasidium				1							1
Cyberlindnera misumaiensis	1	6	3	4	1	5		12	1	2	35
Cyberlindnera saturnus							1		1		2
Cystofilobasidiacea								1			1
Cystofilobasidium							1				1
Cystofilobasidium capitatum						1					1
Cystofilobasidium macerans				2				1			3
Dipodascaceae					1						1
Dipodascus geotrichum					1					1	2
Erythrobasidium hasegawianum							2				2
Filobasidium					1	1			1		3
Filobasidium floriforme	1										1
Filobasidium magnum	1										1
Hanseniaspora uvarum				1				2			3
Hanseniospora						1					1
Holtermanniella		3	1	3	1	1	5	3		1	18
Kregervanrija fluxuum			2	1			1			2	6
Metschnikowia pulcherrima		14		17			4	15	3	2	55
Pichia mandshurica	1	1	4	2	1					1	10
Pichia sporocuriosa										1	1
Pichia terricola	2	1	1	1				4	2	3	14
Pichiaceae		1		1	1		1			11	15
Rhodotorula	1	1			4	3					9
Rhodotorula graminis										1	1
Saccharomycopsis								1			1
Saccharomycopsis schoenii						1	4				5
Saccharomycopsis vini	1									1	2
Saitozyma podzolica								1			1
Schwanniomyces capriottii							2			1	3
Schwanniomyces pseudopolymorphus							2				2
Sporidiobolaceae			1								1
Sporidiobolus metaroseus		2	1	5		4	8	5		1	26
Sporidiobolus pararoseus	1		2								3
Tremellomycetes		1		1	2					1	5
Trichosporon			1			2				2	5
Wickerhamomyces anomalus						1					1
Zygosaccharomyces microellipsoides								1			1
Grand Total	11	46	20	56	27	34	47	66	17	52	376

## Sheet: Isolate list
Isolate	Sample	Species	Isolating fungicide
LF 3.10	Leaf	Aureobasidium pullulans	Flint
LF 5.10.1	Leaf	Aureobasidium pullulans	Flint
LC 1.9	Leaf	Aureobasidium pullulans	Captan
LC 1.3	Leaf	Aureobasidium pullulans	Captan
LC 5.2	Leaf	Aureobasidium pullulans	Captan
LCH 2.1	Leaf	Aureobasidium pullulans	Chorus
LCH 10.2	Leaf	Aureobasidium pullulans	Chorus
LCH 5.9	Leaf	Aureobasidium pullulans	Chorus
LSK 10.4	Leaf	Aureobasidium pullulans	Slick
LSK 2.11	Leaf	Aureobasidium pullulans	Slick
SF 5.9	Soil	Schwanniomyces pseudopolymorphus	Flint
LF 5.11	Leaf	Aureobasidium pullulans	Flint
LF 5.16	Leaf	Aureobasidium pullulans	Flint
LF 5.3	Leaf	Sporidiobolus metaroseus	Flint
LF 5.8	Leaf	Sporidiobolus metaroseus	Flint
SF 5.9	Soil	Schwanniomyces pseudopolymorphus	Flint
SF 6.9	Soil	Cryptococcus laurentii	Flint
SF 5.19	Soil	Cryptococcus laurentii	Flint
SF 5.13	Soil	Kregervanrija fluxuum	Flint
SF 5.15	Soil	Cryptococcus	Flint
LF 5.10	Leaf	Aureobasidium pullulans	Flint
LF 5.6	Leaf	Bullera alba	Flint
SF 5.2	Soil	Saccharomycopsis schoenii	Flint
SF 5.14	Soil	Schwanniomyces capriottii	Flint
LF 5.14.1	Leaf	Erythrobasidium hasegawianum	Flint
SCH 5.6	Soil	Wickerhamomyces anomalus	Chorus
SF 6.18	Soil	Saccharomycopsis schoenii	Flint
SCH 2.1	Soil	Cyberlindnera misumaiensis	Chorus
LCH 10.4	Leaf	Filobasidium	Chorus
LCH 2.4	Leaf	Rhodotorula	Chorus
LCH 2.8	Leaf	Sporidiobolus metaroseus	Chorus
SCH 5.4	Soil	Cryptococcus laurentii	Chorus
SCH 10.1	Soil	Saccharomycopsis schoenii	Chorus
LF 5.20	Leaf	Sporidiobolus metaroseus	Flint
LSK 1.5	Soil	Aureobasidium pullulans	Slick
SF 6.6	Soil	Cryptococcus laurentii	Flint
LF 5.14	Leaf	Erythrobasidium hasegawianum	Flint
LCH10.1	Leaf	Aureobasidium pullulans	Chorus
LC 5.1	Leaf	Filobasidium	Captan
LF 9.2	Leaf	Schwanniomyces capriottii	Flint
SSK 2.4	Soil	Schwanniomyces capriottii	Slick
LCH 10.1	Leaf	Rhodotorula	Chorus
LC 1.4	Leaf	Rhodotorula	Captan
LC 1.1	Leaf	Rhodotorula	Captan
LC 2.6	Leaf	Rhodotorula	Captan
LC 2.1	Leaf	Rhodotorula	Captan
LCH 5.7	Leaf	Sporidiobolus metaroseus	Chorus
LA 2.9	Leaf	Bullera alba	Amphotericin B
L 3	Leaf	Filobasidium	None
LA 2.1	Leaf	Holtermanniella	Amphotericin B
SHOL 2.6	Soil	Cryptococcus laurentii	8-hydroxyquinoline sulfate
SA 2.3	Soil	Cryptococcus laurentii	Amphotericin B
SHOL 2.3	Soil	Rhodotorula	8-hydroxyquinoline sulfate
SA 2.8	Soil	Rhodotorula	Amphotericin B
SA 2.10	Soil	Cyberlindnera misumaiensis	Amphotericin B
SA 2.7	Soil	Cyberlindnera misumaiensis	Amphotericin B
L 5	Leaf	Bullera alba	None
LA 2.11	Leaf	Bullera alba	Amphotericin B
LA 2.12	Leaf	Bullera alba	Amphotericin B
FLSK 1.4	Leaf	Aureobasidium pullulans	Slick
FLSK 5.1	Leaf	Aureobasidium pullulans	Slick
FLSK 5.4	Leaf	Aureobasidium pullulans	Slick
FLSK 1.17	Leaf	Aureobasidium pullulans	Slick
FSHQ 2.6	Soil	Pichia terricola	8-hydroxyquinoline sulfate
FSHQ 1.1	Soil	Cyberlindnera misumaiensis	8-hydroxyquinoline sulfate
FSHQ 1.3	Soil	Pichia terricola	8-hydroxyquinoline sulfate
FSHQ 1.2	Soil	Pichia mandshurica	8-hydroxyquinoline sulfate
FLSSK 5.2	Leaf	Rhodotorula graminis	Slick
FSSK 2.7	Soil	Pichiaceae	Slick
FSSK 5.5	Soil	Cyberlindnera misumaiensis	Slick
FSSK 5.6	Soil	Candida californica	Slick
FLHQ 1.2	Leaf	Sporidiobolus pararoseus	8-hydroxyquinoline sulfate
FSSK 5.1	Soil	Dipodascus geotrichum	Slick
FSSK 2.6	Soil	Candida californica	Slick
FLHQ 2.4	Leaf	Filobasidium magnum	8-hydroxyquinoline sulfate
FSSK 2.3	Soil	Pichia mandshurica	Slick
FLHQ 2.1	Leaf	Filobasidium floriforme	8-hydroxyquinoline sulfate
FSHQ 5.1	Soil	Barnettozyma california	8-hydroxyquinoline sulfate
FSCW 13	Soil	Pichia mandshurica	Captan
FSHQ 1.5	Soil	Saccharomycopsis vini	8-hydroxyquinoline sulfate
FSSK 5.4	Soil	Kregervanrija fluxuum	Slick
FSSK 5.2	Soil	Saccharomycopsis vini	Slick
FSSK 5.1	Soil	Aureobasidium pullulans	Slick
FSPC 2	Soil	Sporidiobolus pararoseus	Boscalid
FSPC 11	Soil	Pichia terricola	Boscalid
FSPC 19	Soil	Sporidiobolus pararoseus	Boscalid
FSPC 4	Soil	Cyberlindnera misumaiensis	Boscalid
FSPC 14	Soil	Pichia mandshurica	Boscalid
FSPC 15	Soil	Pichia mandshurica	Boscalid
FCPC 25	Soil	Pichia mandshurica	Boscalid
FCPC 21	Soil	Pichia mandshurica	Boscalid
FSPC 8	Soil	Sporidiobolus metaroseus	Boscalid
FSPC 22	Soil	Sporidiobolaceae	Boscalid
FSPC 23	Soil	Kregervanrija fluxuum	Boscalid
FSPC 24	Soil	Kregervanrija fluxuum	Boscalid
SFC 8	Soil	Pichia terricola	Fluconazole
SFC 13	Soil	Cyberlindnera misumaiensis	Fluconazole
SFC 18	Soil	Cyberlindnera misumaiensis	Fluconazole
SFC 10	Soil	Apiotrichum	Fluconazole
SFC 11	Soil	Pichia terricola	Fluconazole
SFC 19	Soil	Cyberlindnera misumaiensis	Fluconazole
SFC 20	Soil	Cyberlindnera misumaiensis	Fluconazole
SFC 9	Soil	Cyberlindnera misumaiensis	Fluconazole
SFC 14	Soil	Cryptococcus laurentii	Fluconazole
CS 3	Soil	Tremellomycetes	Captan
CS 5	Soil	Cryptococcus	captan
SFC 17	Soil	Cyberlindnera misumaiensis	Fluconazole
SFC 27	Soil	Cyberlindnera misumaiensis	Fluconazole
CS 4	Soil	Cryptococcus	None
CS 7	Soil	Apiotrichum porosum	None
SFC 36	Soil	Pichia terricola	Fluconazole
SFC 32	Soil	Cryptococcus laurentii	Fluconazole
SFC 30	Soil	Cryptococcus laurentii	Fluconazole
SCH 2.11	Soil	Cyberlindnera misumaiensis	Chorus
SCH 2.20	Soil	Cyberlindnera misumaiensis	Chorus
SCH 2.10	Soil	Trichosporon	Chorus
SCH 2.12	Soil	Trichosporon	Chorus
SCH 2.8	Soil	Cryptococcus laurentii	Chorus
SCH 2.16	Soil	Cryptococcus laurentii	Chorus
SCH 2.19	Soil	Hanseniospora	Chorus
SSK 1.20	Soil	Cyberlindnera misumaiensis	Slick
SSK 1.12	Soil	Pichiaceae	Slick
SSK 1.14	Soil	Cryptococcus laurentii	Slick
SSK 1.9	Soil	Cryptococcus laurentii	Slick
SSK 1.11	Soil	Trichosporon	Slick
SSK 1.13	Soil	Trichosporon	Slick
SB 50.17	Soil	Cyberlindnera misumaiensis	Boscalid
SB 50.8	Soil	Cyberlindnera misumaiensis	Boscalid
SB 50.3	Soil	Trichosporon	Boscalid
SB 50.15	Soil	Holtermanniella	Boscalid
SB 50.1	Soil	Cryptococcus laurentii	Boscalid
SB 50.18	Soil	Cryptococcus laurentii	Boscalid
SC 15.8	Soil	Cyberlindnera misumaiensis	Captan
SC 15.3	Soil	Holtermanniella	Captan
SC 15.10	Soil	Dipodascaceae	Captan
SC 15.21	Soil	Cryptococcus laurentii	Captan
CS 6	Soil	Chytridiales	None
CS 1	Soil	Cyberlindnera saturnus	None
SCH 0.5.1	Soil	Cyberlindnera misumaiensis	Chorus
SCH 0.5.9	Soil	Cryptococcus	Chorus
SC 15.24	Soil	Cryptococcus	Captan
SSK 1.18	Soil	Pichiaceae	Slick
SSK 1.19	Soil	Pichiaceae	Slick
SC 15.22	Soil	Pichiaceae	Captan
SSK 1.18	Soil	Pichiaceae	Slick
SSK 1.4	Soil	Cryptococcus laurentii	Slick
SB 50.12	Soil	Cryptococcus laurentii	Boscalid
SCH 2.1	Soil	Cryptococcus laurentii	Chorus
SB 50.5	Soil	Cryptococcus laurentii	Boscalid
SC 15.6	Soil	Cryptococcus laurentii	Captan
AF4.1	Flower	Aureobasidium pullulans	Amphotericin B
AL4.1	Leaf	Aureobasidium pullulans	Amphotericin B
AL4.3	Leaf	Metschnikowia pulcherrima	Amphotericin B
CaL1.1	Leaf	Aureobasidium pullulans	Capsofungin
ChF4.2	Flower	Aureobasidium pullulans	Chorus
ChF4.3	Flower	Aureobasidium pullulans	Chorus
ChS4.2	Soil	Cryptococcus	Chorus
ChS4.3	Soil	Cyberlindnera misumaiensis	Chorus
CnF4.2	Flower	Aureobasidium pullulans	Capsofungin
CnL4.2	Leaf	Aureobasidium pullulans	Capsofungin
CnL4.3	Leaf	Metschnikowia pulcherrima	Capsofungin
CnL4.4	Leaf	Metschnikowia pulcherrima	Capsofungin
CnS4.1	Soil	Aureobasidium pullulans	Capsofungin
CnS4.2	Soil	Cryptococcus laurentii	Capsofungin
CnS4.4	Soil	Pichiaceae	Capsofungin
F1	Flower	Metschnikowia pulcherrima	None
F2	Flower	Aureobasidium pullulans	None
FF4.1	Flower	Aureobasidium pullulans	Flint
FF4.2	Flower	Aureobasidium pullulans	Flint
FLF 4.3	Flower	Aureobasidium pullulans	Fluconazole
FLF4.2	Flower	Metschnikowia pulcherrima	Fluconazole
FLL1.3	Flower	Aureobasidium pullulans	Fluconazole
FLS4.1	Flower	Cryptococcus laurentii	Fluconazole
FLS4.10	Flower	Cyberlindnera misumaiensis	Fluconazole
FLS4.3	Flower	Cyberlindnera misumaiensis	Fluconazole
FLS4a	Flower	Aureobasidium pullulans	Fluconazole
FLS4.7	Flower	Cyberlindnera misumaiensis	Fluconazole
FLS4.9	Flower	Aureobasidium pullulans	Fluconazole
S2	Soil	Pichia terricola	None
S3	Soil	Pichia terricola	None
S4	Soil	Cyberlindnera misumaiensis	None
S5	Soil	Bullera alba	None
S6	Soil	Cryptococcus laurentii	None
L1	Leaf	Metschnikowia pulcherrima	None
CnS4.5	Soil	Pichia terricola	Capsofungin
AS4.7	Soil	Pichia terricola	Amphotericin B
SS4.8	Soil	Pichia terricola	Slick
FLS4.6	Soil	Pichia terricola	Fluconazole
FLS4.2	Soil	Cystofilobasidiacea	Fluconazole
FLL1.4	Leaf	Metschnikowia pulcherrima	Fluconazole
FLS4.8	Leaf	Metschnikowia pulcherrima	Fluconazole
AS4.9	Soil	Aureobasidium pullulans	Amphotericin B
AS4.3	Soil	Cryptococcus laurentii	Amphotericin B
AS4.4	Soil	Cryptococcus laurentii	Amphotericin B
AS4.1	Soil	Cryptococcus	Amphotericin B
AS4.2	Soil	Pichiaceae	Amphotericin B
AS1a	Soil	Metschnikowia pulcherrima	Amphotericin B
AL4g	Leaf	Metschnikowia pulcherrima	Amphotericin B
CnL3a	Leaf	Metschnikowia pulcherrima	Capsofungin
CnL4b	Leaf	Metschnikowia pulcherrima	Capsofungin
CnS3b	Soil	Metschnikowia pulcherrima	Capsofungin
CnS4d	Soil	Metschnikowia pulcherrima	Capsofungin
FIF4f	Flower	Metschnikowia pulcherrima	Fluconazole
FIL4a	Leaf	Metschnikowia pulcherrima	Fluconazole
FF4c	Flower	Metschnikowia pulcherrima	Flint
CnL4c	Leaf	Aureobasidium pullulans	Capsofungin
CnS4o	Soil	Cyberlindnera misumaiensis	Capsofungin
CnS4L	Soil	Sporidiobolus metaroseus	Capsofungin
SS2a	Soil	Pichiaceae	Slick
CnS4g	Soil	Tremellomycetes	Capsofungin
AS4d	Soil	Cyberlindnera misumaiensis	Amphotericin B
SS3c	Soil	Kregervanrija fluxuum	Slick
CnF4q	Flower	Metschnikowia pulcherrima	Capsofungin
FF4a	Flower	Metschnikowia pulcherrima	Flint
AF4d	Flower	Metschnikowia pulcherrima	Amphotericin B
SL1f	Leaf	Metschnikowia pulcherrima	Slick
SL1e	Leaf	Metschnikowia pulcherrima	Slick
AL4b	Leaf	Metschnikowia pulcherrima	Amphotericin B
CnF4v	Flower	Metschnikowia pulcherrima	Capsofungin
AL4c	Leaf	Metschnikowia pulcherrima	Amphotericin B
CnL2	Leaf	Metschnikowia pulcherrima	Capsofungin
CnF4d	Flower	Metschnikowia pulcherrima	Capsofungin
CnF4p	Flower	Metschnikowia pulcherrima	Capsofungin
AL4b	Leaf	Metschnikowia pulcherrima	Amphotericin B
AF4g	Flower	Metschnikowia pulcherrima	Amphotericin B
AF4b	Flower	Metschnikowia pulcherrima	Amphotericin B
CnF4a	Flower	Metschnikowia pulcherrima	Capsofungin
CnF4w	Flower	Metschnikowia pulcherrima	Capsofungin
CnF4h	Flower	Metschnikowia pulcherrima	Capsofungin
CnF4n	Flower	Metschnikowia pulcherrima	Capsofungin
CnF4s	Flower	Metschnikowia pulcherrima	Capsofungin
AF4h	Flower	Metschnikowia pulcherrima	Amphotericin B
AF4e	Flower	Metschnikowia pulcherrima	Amphotericin B
SL2s	Soil	Aureobasidium pullulans	Slick
SL1b	Soil	Aureobasidium pullulans	Slick
CnF4j	Flower	Aureobasidium pullulans	Capsofungin
CnF4o	Flower	Aureobasidium pullulans	Capsofungin
AL4e	Leaf	Aureobasidium pullulans	Amphotericin B
AL4a	Leaf	Aureobasidium pullulans	Amphotericin B
AL4f	Leaf	Aureobasidium pullulans	Amphotericin B
CnL4a	Leaf	Aureobasidium pullulans	Capsofungin
CnF4e	Flower	Aureobasidium pullulans	Capsofungin
CnL3b	Leaf	Aureobasidium pullulans	Capsofungin
SS3a	Soil	Pichia sporocuriosa	Slick
SS2b	Soil	Pichia terricola	Slick
AS4a	Soil	Pichia mandshurica	Amphotericin B
CnS4f	Soil	Pichia mandshurica	Capsofungin
CnS4c	Soil	Pichia mandshurica	Capsofungin
CaS2	Soil	Dipodascus geotrichum	captan
CaS1b	Soil	Tremellomycetes	captan
CnS4a	Soil	Sporidiobolus metaroseus	Capsofungin
CnS4n	Soil	Cystofilobasidium macerans	Capsofungin
AS4e	Soil	Cyberlindnera misumaiensis	Amphotericin B
CnS4h	Soil	Cyberlindnera misumaiensis	Capsofungin
CnS4b	Soil	Cyberlindnera misumaiensis	Capsofungin
CnS4m	Soil	Cyberlindnera misumaiensis	Capsofungin
AS4c	Soil	Cyberlindnera misumaiensis	Amphotericin B
AS4b	Soil	Cyberlindnera misumaiensis	Amphotericin B
FlL3	Leaf	Aureobasidium pullulans	Fluconazole
Fl4c	Flower	Aureobasidium pullulans	Fluconazole
FlL4b	Leaf	Aureobasidium pullulans	Fluconazole
FF4e	Flower	Aureobasidium pullulans	Flint
FlF4g	Flower	Aureobasidium pullulans	Fluconazole
FlF4a	Flower	Aureobasidium pullulans	Fluconazole
FlF4c	Flower	Aureobasidium pullulans	Fluconazole
FF4d	Flower	Aureobasidium pullulans	Flint
FlL4d	Leaf	Metschnikowia pulcherrima	Fluconazole
FIL4c	Leaf	Metschnikowia pulcherrima	Fluconazole
FlF4d	Flower	Metschnikowia pulcherrima	Fluconazole
FF4g	Flower	Metschnikowia pulcherrima	Flint
FlS1	Soil	Metschnikowia pulcherrima	Fluconazole
FlS4a	Soil	Cryptococcus	Fluconazole
FlS4d	Soil	Barnettozyma california	Fluconazole
FlS4b	Soil	Cyberlindnera misumaiensis	Fluconazole
FlS4e	Soil	Zygosaccharomyces microellipsoides	Fluconazole
FlF4c	Flower	Metschnikowia pulcherrima	Fluconazole
FlF4a	Flower	Metschnikowia pulcherrima	Fluconazole
AF4c	Flower	Metschnikowia pulcherrima	Amphotericin B
AF4a	Flower	Metschnikowia pulcherrima	Amphotericin B
SS1.31	Soil	Holtermanniella	Slick
FFr4.2	Fruit	Holtermanniella	Flint
AS4.30	Soil	Cryptococcus laurentii	Amphotericin B
CnFr4.4	Fruit	Aureobasidium pullulans	Capsofungin
ChS4.30	Soil	Cystofilobasidium capitatum	Chorus
CnS3.1	Soil	Cystofilobasidium macerans	Capsofungin
AS4.31	Soil	Tremellomycetes	Amphotericin B
SS1.30	Soil	Tremellomycetes	Slick
CnFr4.4	Fruit	Aureobasidium pullulans	Capsofungin
FFr4.1	Fruit	Sporidiobolus metaroseus	Flint
CnL4.32	Leaf	Sporidiobolus metaroseus	Capsofungin
FS3b	Soil	Sporidiobolus metaroseus	Flint
ChF4.31	Flower	Sporidiobolus metaroseus	Chorus
FS3a	Soil	Sporidiobolus metaroseus	Flint
SFr4.6	Fruit	Aureobasidium pullulans	Slick
CaFr3.3	Fruit	Aureobasidium pullulans	Captan
Fr2	Fruit	Aureobasidium pullulans	None
CaFr1.1	Fruit	Aureobasidium pullulans	captan
Fr1	Fruit	Aureobasidium pullulans	None
CaFr3.0	Fruit	Aureobasidium pullulans	Captan
AF4.1	Flower	Aureobasidium pullulans	Amphotericin B
FL4.31	Flower	Aureobasidium pullulans	Fluconazole
CaFr3.1	Fruit	Aureobasidium pullulans	Captan
SFr3.1	Fruit	Aureobasidium pullulans	Slick
FlS4.30	Soil	Holtermanniella	Fluconazole
FlS4.31	Soil	Holtermanniella	Fluconazole
CnF3.1	Flower	Holtermanniella	Capsofungin
FS4.34	Soil	Holtermanniella	Flint
AS4.34	Soil	Holtermanniella	Amphotericin B
FS4.33	Soil	Holtermanniella	Flint
FlFr4.1	Fruit	Holtermanniella	Fluconazole
SS4.30	Soil	Pichiaceae	Slick
SS4.32	Soil	Pichiaceae	Slick
SS4.33	Soil	Pichiaceae	Slick
FS3.2	Soil	Pichiaceae	Flint
SS4.34	Soil	Pichiaceae	Slick
SS4.31	Soil	Pichiaceae	Slick
FlL4.30	Leaf	Sporidiobolus metaroseus	Fluconazole
SFr1.1	Fruit	Sporidiobolus metaroseus	Slick
FlL3.2	Leaf	Sporidiobolus metaroseus	Fluconazole
Fl4.30	Leaf	Sporidiobolus metaroseus	Fluconazole
FS4.32	Soil	Sporidiobolus metaroseus	Flint
FlS4a	Soil	Cryptococcus/ Naganishia	Fluconazole
FS4.31	Soil	Cystofilobasidium	Flint
CnFr4.1	Fruit	Curvibasidium	Capsofungin
FlS4.7	Soil	Cyberlindnera misumaiensis	Fluconazole
FlS4.34	Soil	Saccharomycopsis	Fluconazole
CnS3.1	Soil	Cryptococcus laurentii	Capsofungin
FlS3.2	Soil	Saitozyma podzolica	Fluconazole
FlS4.33	Soil	Apiotrichum porosum	Fluconazole
FS1.3	Soil	Apiotrichum porosum	Flint
F1	Flower	Metschnikowia pulcherrima	None
SFr4.2	Fruit	Aureobasidium pullulans	Slick
FFr4.3	Fruit	Aureobasidium pullulans	Flint
SFr4.1	Fruit	Aureobasidium pullulans	Slick
CnL4.30	leaf	Aureobasidium pullulans	Capsofungin
CaFr2.2	Fruit	Aureobasidium pullulans	Captan
FlS4.32	Soil	Sporidiobolus metaroseus	Fluconazole
FlFr4.2	Fruit	Sporidiobolus metaroseus	Fluconazole
FFr4.4	Fruit	Sporidiobolus metaroseus	Flint
CnL1.1	Leaf	Sporidiobolus metaroseus	Capsofungin
CnFr4.6	Fruit	Sporidiobolus metaroseus	Capsofungin
CnF4g	Flower	Metschnikowia pulcherrima	Capsofungin
ChS4.34	Soil	Cryptococcus laurentii	Chorus
ChS4.32	Soil	Cryptococcus laurentii	Chorus
AS4.32	Soil	Cryptococcus laurentii	Amphotericin B
CnS4.35	Soil	Cryptococcus laurentii	Capsofungin
ChFr4.3	Fruit	Sporidiobolus metaroseus	Chorus
AL4.30	Leaf	Sporidiobolus metaroseus	Amphotericin B
AL4.31	Leaf	Sporidiobolus metaroseus	Amphotericin B
CnS4.34	Soil	Holtermanniella	Capsofungin
CnL4.31	Leaf	Holtermanniella	Capsofungin
AFr4.2	Fruit	Holtermanniella	Amphotericin B
FS3c	Soil	Holtermanniella	Flint
FlF4b	Flower	Hanseniaspora uvarum	Fluconazole
FS4	Soil	Saccharomycopsis schoenii	Flint
FlF4b	Flower	Hanseniaspora uvarum	Fluconazole
FS4	Soil	Saccharomycopsis schoenii	Flint
ChS4.35	Soil	Rhodotorula	Chorus
CnS4.36	Soil	Kregervanrija fluxuum	Capsofungin
SFr4.3	Fruit	Aureobasidium pullulans	Slick
SFr4.4	Fruit	Aureobasidium pullulans	Slick
CaFr2.1	Fruit	Aureobasidium pullulans	Captan
CaFr3.2	Fruit	Aureobasidium pullulans	Captan
FF4f	Flower	Metschnikowia pulcherrima	Flint
AL3	Leaf	Metschnikowia pulcherrima	Amphotericin B
FlF4b	Flower	Metschnikowia pulcherrima	Fluconazole
FlF4e	Flower	Metschnikowia pulcherrima	Fluconazole
FlF4h	Flower	Metschnikowia pulcherrima	Fluconazole
FlF4k	Flower	Metschnikowia pulcherrima	Fluconazole
FS3c	Soil	Holtermanniella	Flint
ChS4.31	Soil	Holtermanniella	Chorus
FS1.4	Soil	Cyberlindnera saturnus	Flint
CnS3a	Soil	Hanseniaspora uvarum	Capsofungin
ChS4.33	Soil	Apiotrichum porosum	Capsofungin
Fl4Fb	Flower	Cystofilobasidium macerans	Fluconazole
SS4.8	Soil	Pichia terricola	Slick
